# Supplementary material for: The long-term trend and production sensitivity change in the US ozone pollution from observations and model simulations
Source: Copernicus journal article supplement (doi:10.5194/acp-20-3191-2020), 2020-03-17
Supplement: Supplementary file 1 [file acp-20-3191-2020-supplement.pdf]

Supplement of Atmos. Chem. Phys., 20, 3191–3208, 2020  
<https://doi.org/10.5194/acp-20-3191-2020-supplement>  
© Author(s) 2020. This work is distributed under  
the Creative Commons Attribution 4.0 License.

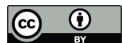

*Supplement of*

## **The long-term trend and production sensitivity change in the US ozone pollution from observations and model simulations**

**Hao He et al.**

*Correspondence to:* Xin-Zhong Liang (xliang@umd.edu)

The copyright of individual parts of the supplement might differ from the CC BY 4.0 License.

## Evaluation of the $O_3/NO_y$ ratio threshold

In our study, we could not access the research grade  $NO_y$  observations from the EPA observations and did not conduct long-term sensitivity experiments of CMAQ with reduced emissions rates. So we have to rely on results from the previous studies. Sillman explored the concept using photochemical indicators including  $O_3/NO_y$  to identify the regime of ozone photochemical production, finding that the link between the ozone production sensitivity and these indicators is largely unaffected by changes in model assumptions, including emission rates of anthropogenic and biogenic species (Sillman, 1995; Sillman et al., 1997). Observations from urban areas of Atlanta, New York, and Los Angeles was compared with modeling results from the Urban Airshed Model at urban scales, and threshold of 7 was proposed for using  $O_3/NO_y$  ratio as the photochemical indicator (Sillman et al., 1997). Zhang et al. (2009) expanded the study to the CONUS with 1-year CMAQ simulations, and suggested a threshold of 15 for  $O_3/NO_y$  ratio. Zhang et al. (2009) used previous CMAQ version 4.4 for 1-yr CONUS simulations of 2001 at a coarse spatial resolution (36 km) which is close to our 30-km CONUS domain, so we adopted their proposed threshold and evaluated it with the following approach.

We selected hourly  $O_3$ ,  $NO_y$ , and  $NO_x$  concentrations from CMAQ in the afternoon (defined as 12 pm to 4 pm) in 2004, and calculated the  $O_3/NO_y$  ratios. Figure S1a shows scatter density of  $O_3/NO_y$  ratios vs.  $NO_x$  concentrations, which is calculated based on a  $100 \times 100$  bins with  $NO_x$  from 0-20 ppbv  $NO_x$  (i.e., 0.2 ppbv per bin) and 0-100  $O_3/NO_y$  ratios (i.e., 1 per bin). In the afternoon over the CONUS, the ozone production is mainly in high  $O_3/NO_y$  ( $>15$ ) and low  $NO_x$  (less than 2 ppbv) environment, i.e., in the  $NO_x$ -sensitive regions by thresholds proposed by both Sillman et al. (1997) and Zhang et al. (2009). Figure S1b shows the same density plot, but the color stands for mean  $O_3$  concentrations. Both low and high ozone concentrations exist in high  $NO_x$  region ( $NO_x > 4$  ppbv), which are usually urban or suburban. Then we calculated the weighted ozone concentrations which equals to the product of  $O_3/NO_y$  and  $NO_x$  scatter density (Fig. 4a) and mean  $O_3$  concentrations (Fig. S1b), which stands for the  $O_3$  sensitivity with respect to  $O_3/NO_y$  ratios and  $NO_y$  concentrations over the CONUS (Fig. S1c). At the national scale, when the weighted ozone concentrations increase with CMAQ  $NO_x$  levels, the photochemical production is  $NO_x$ -sensitive. The region with  $O_3/NO_y$  higher than 7 and 11 both have this characteristics, while due to low probability (Fig. S1a) and urban environment (Fig. S1b) we believe the  $O_3/NO_y$  threshold of 7 stands for the urban environment. The  $O_3/NO_y$  ratio threshold of 15 is more proper for the CONUS scale analysis. This analysis qualitatively supports our application of  $O_3/NO_y$  threshold from Zhang et al. (2009).

a)

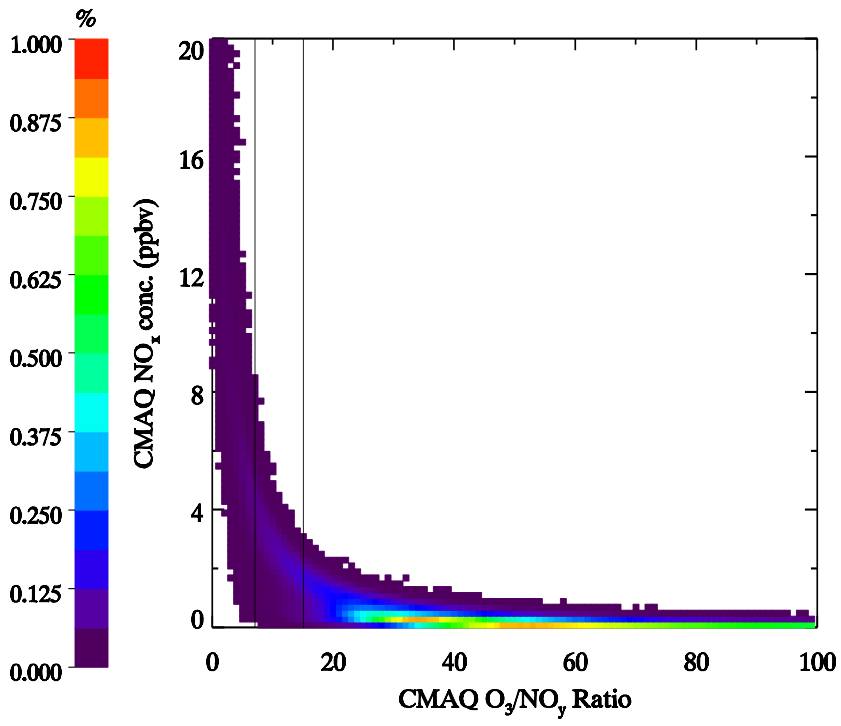

b)

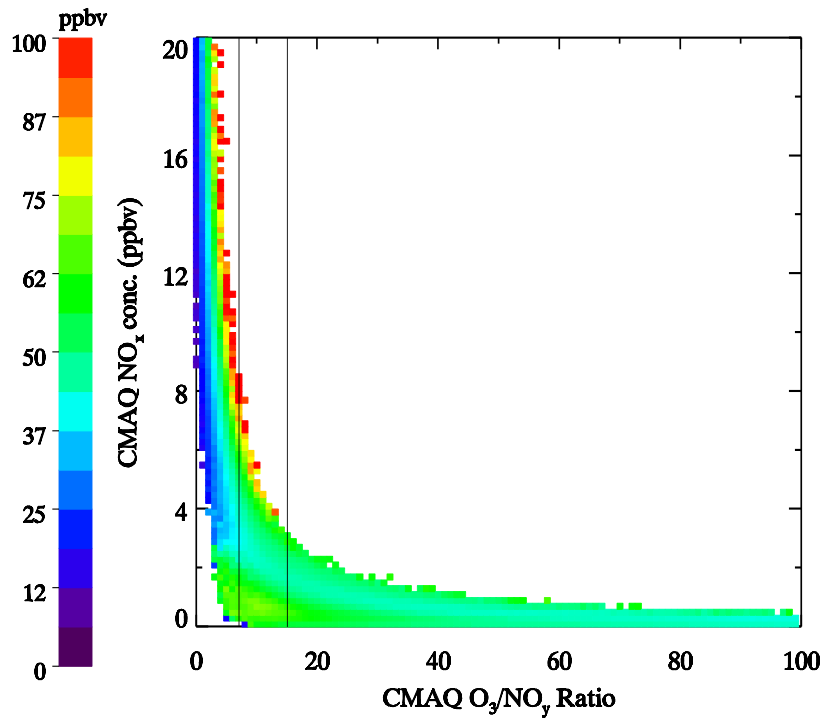

c)

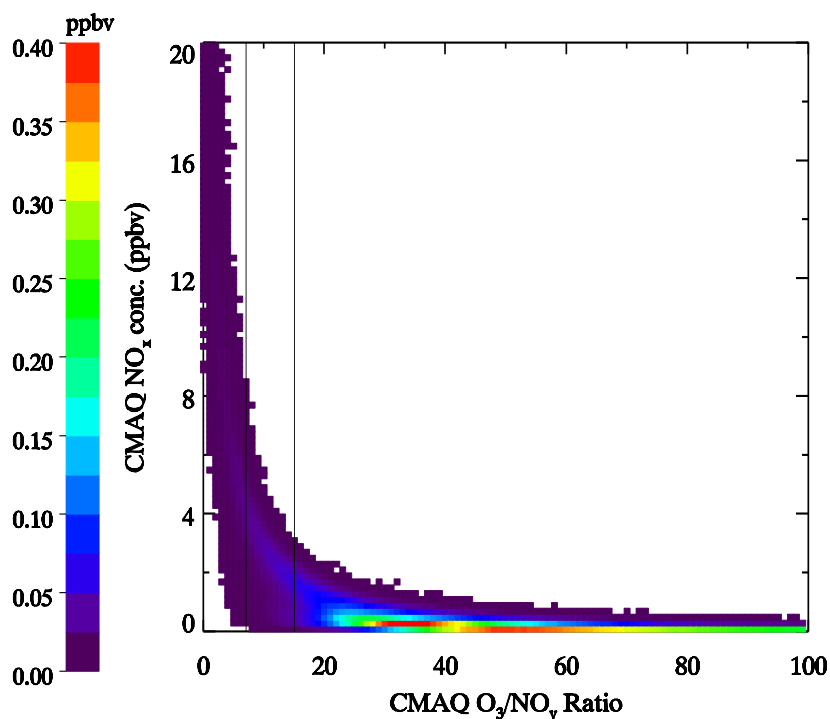

Figure S1. Afternoon  $\text{O}_3/\text{NO}_y$  ratios vs.  $\text{NO}_x$  concentrations simulated by CMAQ in 2014. a) Scatter density, the color contour stands for the probability for each bin; b)  $\text{O}_3$  concentrations, the color contour stands for the mean  $\text{O}_3$  over the bins; c) Weighted  $\text{O}_3$  concentrations. Two black lines stand for the  $\text{O}_3/\text{NO}_y$  ratios of 7 and 11.

#### References:

- Sillman, S.: The use of  $\text{NO}_y$ ,  $\text{H}_2\text{O}_2$ , and  $\text{HNO}_3$  as indicators for ozone- $\text{NO}_x$ -hydrocarbon sensitivity in urban locations, *Journal of Geophysical Research-Atmospheres*, 100, 14175-14188, 10.1029/94jd02953, 1995.
- Sillman, S., He, D., Cardelino, C., and Imhoff, R. E.: The Use of Photochemical Indicators to Evaluate Ozone- $\text{NO}_x$ -Hydrocarbon Sensitivity: Case Studies from Atlanta, New York, and Los Angeles, *J. Air Waste Manage. Assoc.*, 47, 1030-1040, 10.1080/10962247.1997.11877500, 1997.
- Zhang, Y., Wen, X. Y., Wang, K., Vijayaraghavan, K., and Jacobson, M. Z.: Probing into regional  $\text{O}_3$  and particulate matter pollution in the United States: 2. An examination of formation mechanisms through a process analysis technique and sensitivity study, *Journal of Geophysical Research-Atmospheres*, 114, 10.1029/2009jd011900, 2009.
